# Supplementary material for: A Long-Term, Open-Label Study to Evaluate the Safety and Tolerability of Brexpiprazole as Maintenance Treatment in Adults with Schizophrenia
Source: PubMed Central journal article supplement — Int J Neuropsychopharmacol. 2018 Feb 3;21(5):433–41. doi: 10.1093/ijnp/pyy002 (PMC5932477; doi:10.1093/ijnp/pyy002), 2018-02-03
Supplement: pyy002_suppl_supplementary_material.pdf [file pyy002_suppl_supplementary_material.pdf]

## Supplementary material

### **A long-term, open-label study to evaluate the safety and tolerability of brexpiprazole as maintenance treatment in adults with schizophrenia**

Andy Forbes, PhD<sup>1</sup>; Mary Hobart, PhD<sup>1</sup>; John Ouyang, PhD<sup>1</sup>; Lily Shi, MD, MS<sup>1</sup>; Stephanie Pfister, MA, MBA<sup>1</sup>; Mika Hakala, MD, PhD<sup>2</sup>

<sup>1</sup>Otsuka Pharmaceutical Development & Commercialization Inc., 508 Carnegie Center Drive, 1 University Square Drive, Princeton, NJ 08540, USA.

<sup>2</sup>H. Lundbeck A/S, Ottiliavej 9, 2500, Valby, Copenhagen, Denmark.

**Supplementary Table S1.** Summary of safety outcomes over 52 weeks for patients with schizophrenia receiving open-label brexpiprazole 1–4 mg/day

| <b>Safety population<br/>(n=1,031)</b>                                                                          |                  |              |
|-----------------------------------------------------------------------------------------------------------------|------------------|--------------|
| <b>Incidence of treatment-emergent suicidality,<sup>a</sup> % (n/N)</b>                                         |                  |              |
| C-SSRS Suicidal ideation                                                                                        | 3.6 (37/1,031)   |              |
| C-SSRS Suicidal behavior                                                                                        | 0.2 (2/1,031)    |              |
| <b>Incidence of categorical increase in prolactin level, by gender,<sup>b</sup> % (n/N)</b>                     |                  |              |
|                                                                                                                 | <b>Female</b>    | <b>Male</b>  |
| >2x ULN                                                                                                         | 4.5 (17/374)     | 4.1 (24/592) |
| >3x ULN                                                                                                         | 3.7 (14/374)     | 2.0 (12/592) |
| <b>Incidence of treatment-emergent potentially clinically significant change in lipids and glucose, % (n/N)</b> |                  |              |
| Fasting total cholesterol shift from normal (<200 mg/dL) to high (≥240 mg/dL)                                   | 6.1 (35/571)     |              |
| Fasting HDL cholesterol shift from normal (≥40 mg/dL) to low (<40 mg/dL)                                        | 20.6 (150/727)   |              |
| Fasting LDL cholesterol shift from normal (<100 mg/dL) to high (≥160 mg/dL)                                     | 2.9 (10/350)     |              |
| Fasting triglycerides shift from normal (<150 mg/dL) to high (200 to <500 mg/dL)                                | 14.8 (93/629)    |              |
| Fasting glucose shift from normal/impaired (<126 mg/dL) to high (≥126 mg/dL)                                    | 10.7 (93/867)    |              |
| <b>Incidence of ≥7% weight change, % (n/N)</b>                                                                  |                  |              |
| ≥7% weight increase                                                                                             | 18.6 (189/1,016) |              |
| ≥7% weight decrease                                                                                             | 9.2 (93/1,016)   |              |
| <b>Incidence of categorical increase in QT evaluations, % (n/N)</b>                                             |                  |              |
| QT <sub>CF</sub> >500 msec <sup>c</sup>                                                                         | 0.1 (1/978)      |              |

Abbreviations: C-SSRS, Columbia Suicide Severity Rating Scale; HDL, high-density lipoprotein; LDL, low-density lipoprotein; n/N, number of patients with potentially clinically relevant shift/total number of patients in category; QT<sub>CF</sub>, QT interval corrected by Fridericia's formula; ULN, upper limit of the normal range.

Incidences are at any time post-baseline during the open-label treatment phase.

<sup>a</sup>Emergence of suicidal ideation/behavior was defined as a report of any type of suicidal ideation/behavior during treatment when there was no baseline suicidal ideation (past 6 months)/behavior (past 2 years).

<sup>b</sup>Patients counted once, in the highest category that applies.

<sup>c</sup>New onset, i.e., a patient with a value of >500 msec during treatment but not at baseline.

**Supplementary Table S2.** Summary of formal extrapyramidal symptom rating scale scores over 52 weeks for patients with schizophrenia receiving open-label brexpiprazole 1–4 mg/day

|                                         | <b>Safety population</b>                   |                                                                       |
|-----------------------------------------|--------------------------------------------|-----------------------------------------------------------------------|
|                                         | <b>Mean (SD) at<br/>baseline (n=1,024)</b> | <b>Mean (SD) change<br/>from baseline to last<br/>visit (n=1,012)</b> |
| SAS Total score                         | 0.40 (1.20) <sup>a</sup>                   | 0.00 (1.20) <sup>b</sup>                                              |
| BARS Global score                       | 0.09 (0.41)                                | 0.01 (0.48)                                                           |
| AIMS Movement rating score <sup>c</sup> | 0.22 (0.93)                                | 0.05 (0.97)                                                           |

Abbreviations: AIMS, Abnormal Involuntary Movement Scale; BARS, Barnes Akathisia Rating Scale; SAS, Simpson–Angus Scale; SD, standard deviation.

<sup>a</sup>n=1,020.

<sup>b</sup>n=1,010.

<sup>c</sup>AIMS Movement rating score was defined as the sum of items 1–7 (facial and oral, extremity, and trunk movements).

**Supplementary Table S3.** Summary of resource utilization over 52 weeks for patients with schizophrenia receiving open-label brexpiprazole 1–4 mg/day

|                                                                               | <b>Safety population<br/>(n=1,031)</b> |                            |
|-------------------------------------------------------------------------------|----------------------------------------|----------------------------|
| Hospitalized for exacerbation of symptoms, n (%)                              | 108 (10.5)                             |                            |
| <b>Annual use (average use per 365.25 person days)</b>                        | <b>Baseline<br/>(n=1,024)</b>          | <b>Week 52<br/>(n=409)</b> |
| Primary care doctor                                                           | 1.2                                    | 1.1                        |
| Psychiatrist                                                                  | 2.6                                    | 0.7                        |
| Counsellor, psychologist, or other mental health professional                 | 2.3                                    | 1.5                        |
| Other physician                                                               | 0.2                                    | 0.2                        |
| Emergency room or urgent care facility for emotions, nerves, or mental health | 0.2                                    | 0.0                        |
| Emergency room or urgent care facility for other reason                       | 0.0                                    | 0.0                        |
